# Supplementary material for: Low-entropy amorphous dielectric polymers for high-temperature capacitive energy storage
Source: Royal Society of Chemistry journal article supplement (doi:10.1039/d4ee02455a), 2024-01-01
Supplement: d4ee02455a1.pdf [file d4ee02455a1.pdf]

## Supplementary Materials for

### Low-entropy Amorphous Dielectric Polymers for High-Temperature Capacitive Energy Storage

Qiyang Zhang<sup>a, †</sup>, Dongmou Li<sup>a</sup>, Yueqi Zhong<sup>a</sup>, Yuna Hu<sup>a</sup>, Shuangwu Huang<sup>a, †</sup>, Shuxiang Dong<sup>b</sup>, Q.M. Zhang<sup>c, †</sup>

- a. State Key Laboratory of Radio Frequency Heterogeneous Integration, College of Electronics and Information Engineering, Institute of Microelectronics (IME), Shenzhen University, Shenzhen 518060, China
- b. Institute for Advanced Study, Shenzhen University, Shenzhen, 518061, China
- c. School of Electrical Engineering and Computer Science, Materials Research Institute, The Pennsylvania State University, University Park, PA, USA

<sup>†</sup>Correspondence: [qxz1@psu.edu](mailto:qxz1@psu.edu), [zhangqy15@tsinghua.org.cn](mailto:zhangqy15@tsinghua.org.cn), [mark\\_huang@szu.edu.cn](mailto:mark_huang@szu.edu.cn)

#### **This PDF file includes:**

Figures. S1 to S13.

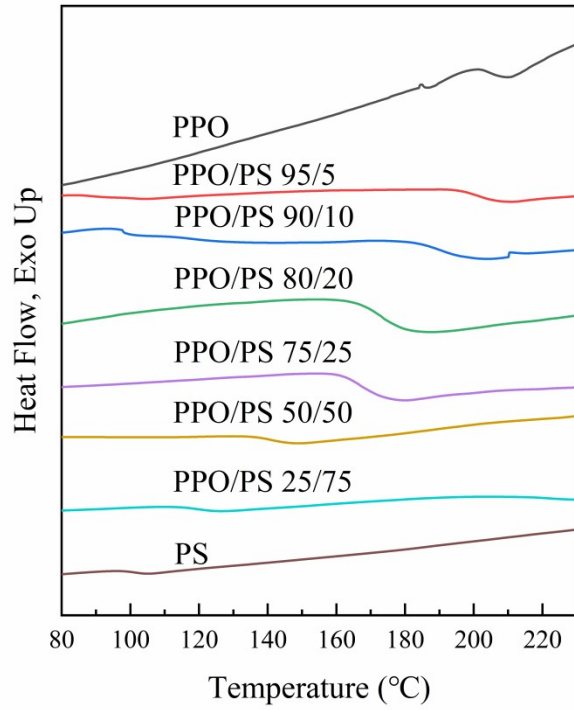

**Figure S1.** DSC heating curves of PPO/PS blends with different compositions.

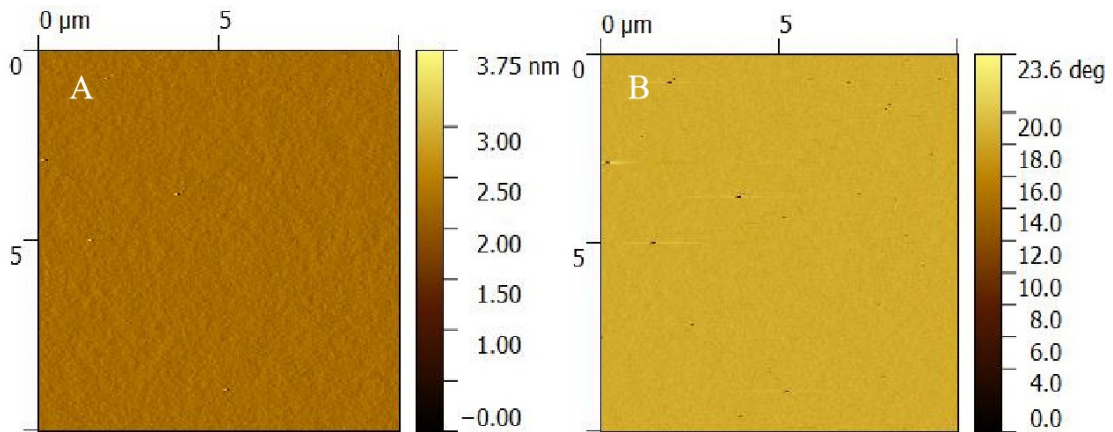

**Figure S2.** Tapping-mode AFM data for neat PPO. (A) topography and (B) phase images with a scanning area of 10×10 μm.

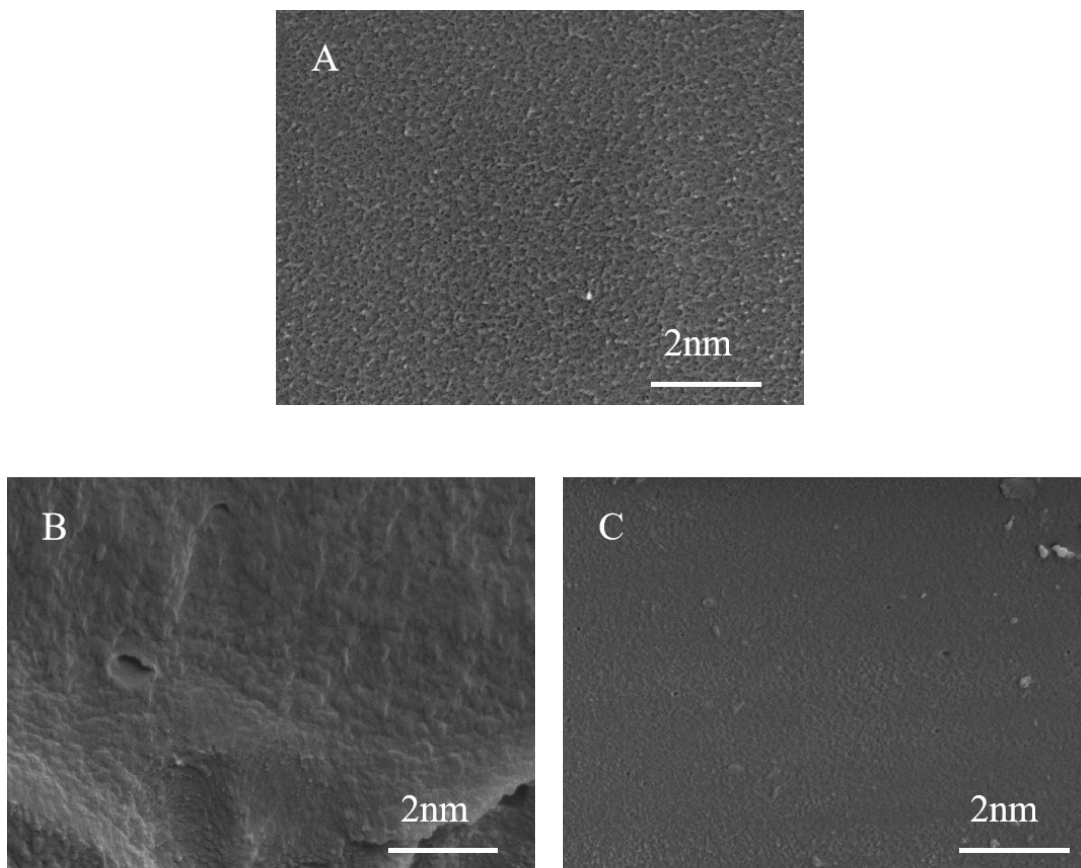

**Figure S3.** SEM images of (A) PPO/PS 75%/25%, (B) PPO and (C) PS.

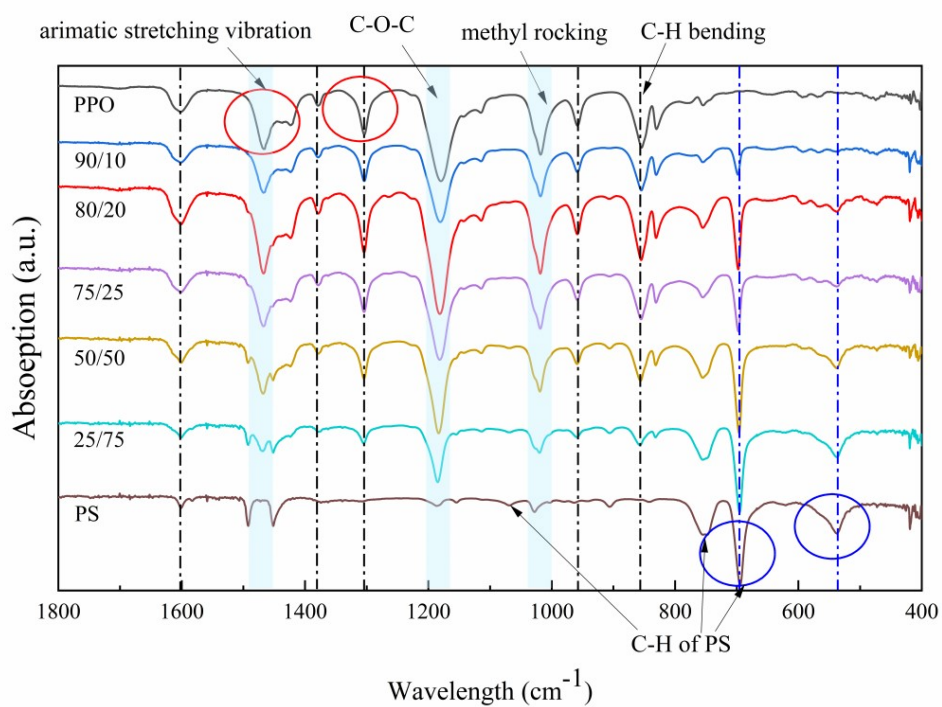

**Figure S4.** FT-IR spectra of PPO/PS blends with different composition.

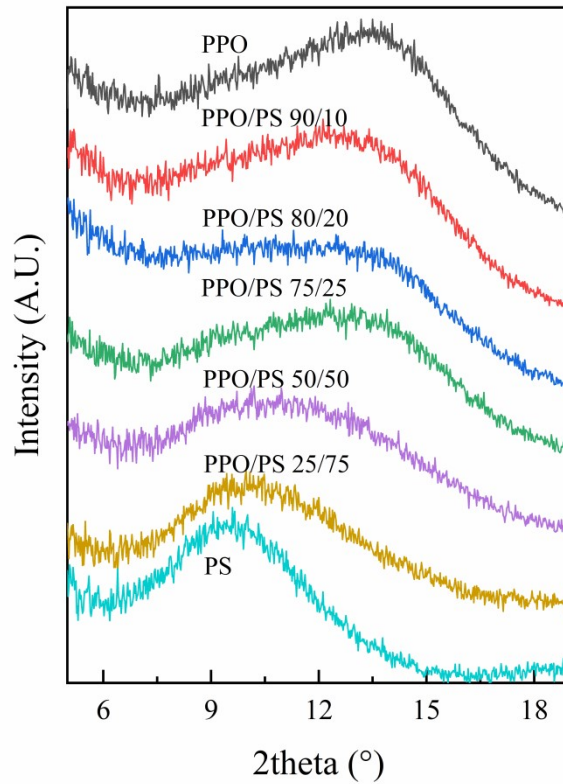

**Figure S5.** X-ray diffraction (XRD) curves of PPO/PS blends with different composition.

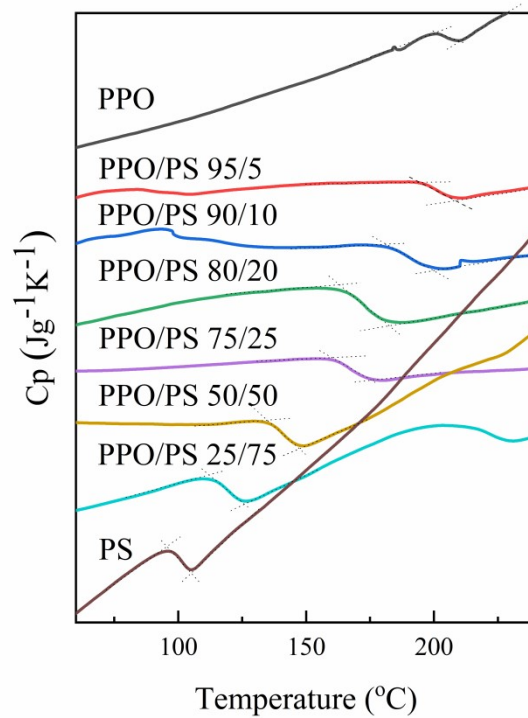

**Figure S6.** Specific heat capacity ( $C_p$ ) versus temperature of PPO/PS blends with different compositions.

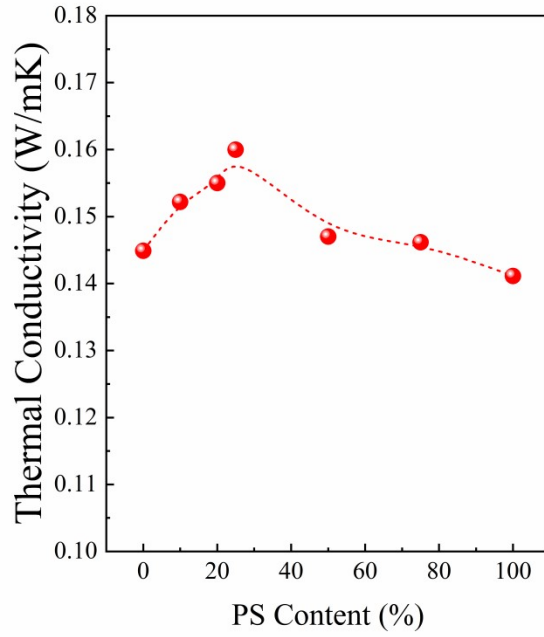

**Figure S7.** Thermal Conductivity of PPO/PS blends with different compositions.

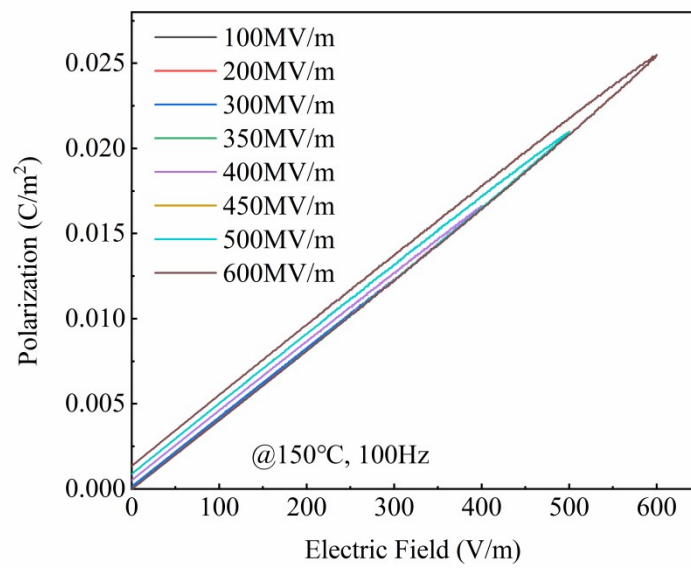

**Figure S8.** *P-E* loops of PPO/PS 75%/25% measured at 150°C and different electric field.

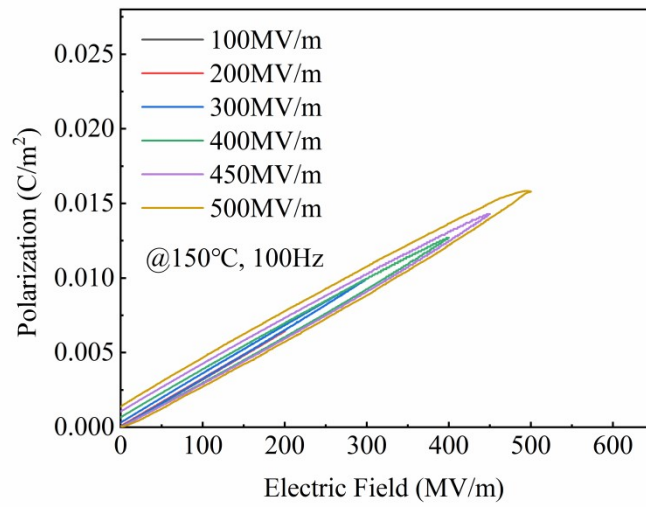

**Figure S9.** *P-E* loops of PPO measured at 150°C and different electric field.

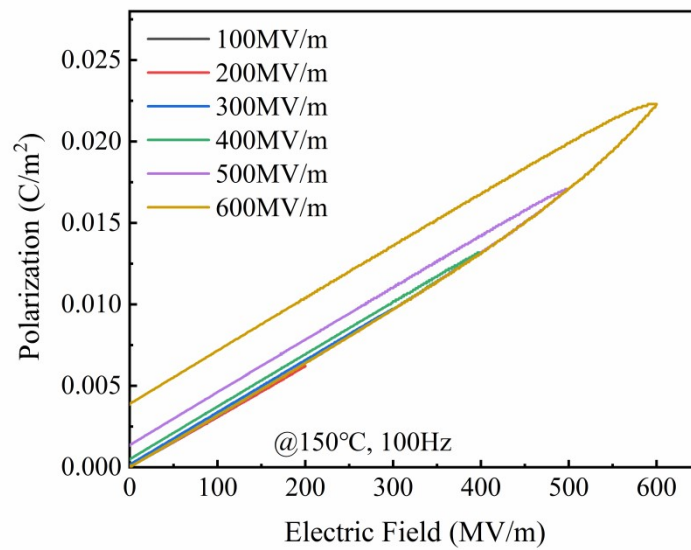

**Figure S10.** *P-E* loops of PEI measured at 150°C and different electric field.

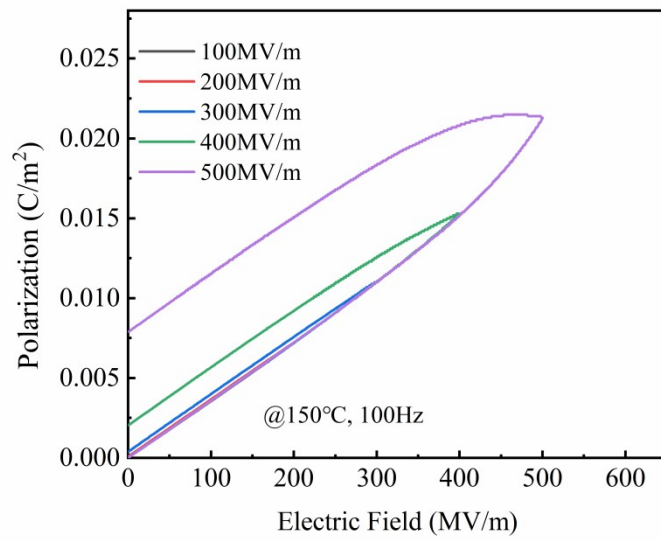

**Figure S11.** *P-E* loops of PC measured at 150°C and different electric field.

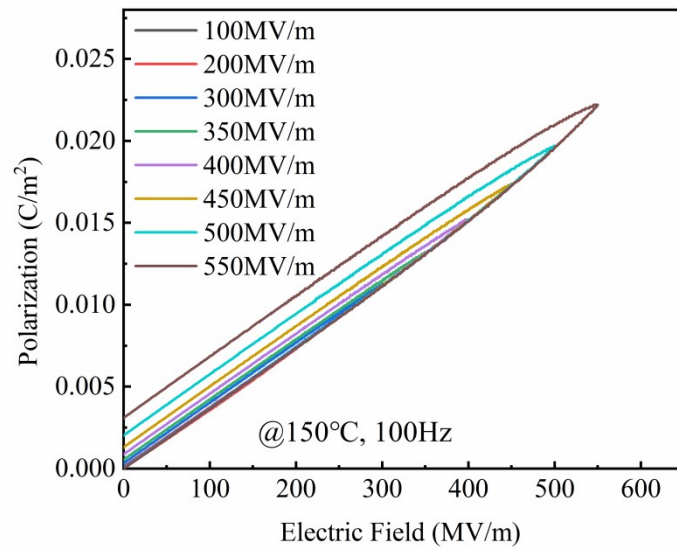

**Figure S12.** *P-E* loops of PSU measured at 150°C and different electric field.

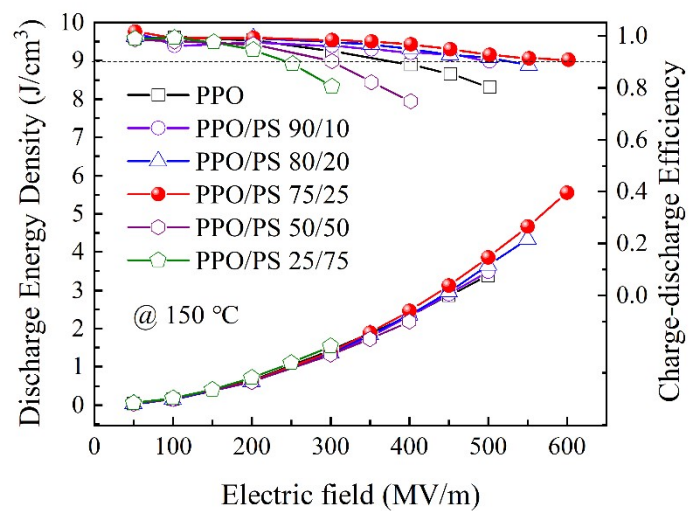

**Figure S13.** Discharged energy density and charge–discharge efficiency of PPO/PS blends with different compositions measured at 150°C.
